# A survey of pathogens and metazoan parasites on wild sea trout (*Salmo trutta*) in Scottish waters

Katy Urquhart, Campbell C. Pert, Rob J. Fryer, Paul Cook, Sarah Weir, Rachel Kilburn, Una McCarthy, Judy Simons, Sonia J. McBeath, Iveta Matejusova, and Ian R. Bricknell

Urquhart, K., Pert, C. C., Fryer, R. J., Cook, P., Weir, S., Kilburn, R., McCarthy, U., Simons, J., McBeath, S. J., Matejusova, I., and Bricknell, I. R. 2010. A survey of pathogens and metazoan parasites on wild sea trout (*Salmo trutta*) in Scottish waters. – ICES Journal of Marine Science, 67: 444–453.

In all, 300 wild sea trout were sampled from three east coast and two west coast sites around Scotland over a 3-year period to establish the prevalence and the abundance of bacteria, viruses, and ecto- and endoparasites. No bacterial pathogens were isolated from any fish. One fish tested positive for viral pathogens (infectious pancreatic necrosis virus). The viral agent syncytium, resulting from aquareovirus infection, was found in four fish from the east coast. The parasitic fauna consisted of three classes of ectoparasite, Monogenea, Isopoda, and Copepoda, and four classes of endoparasite, Cestoda, Digenea, Nematoda, and Acanthocephala. Sea trout from the east coast sites were larger than those from the west coast. The abundance of *Lepeophtheirus salmonis*, *Hysterothylacium aduncum*, and *Anisakis* sp. was significantly greater at the east coast sites. The only parasite found in significantly greater numbers at a west coast site was *Pomphorhynchus laevis*.

**Keywords:** disease, parasites, Scotland, sea lice, sea trout.

Received 30 June 2009; accepted 5 November 2009; advance access publication 17 December 2009.

K. Urquhart, C. C. Pert, R. J. Fryer, P. Cook, S. Weir, R. Kilburn, U. McCarthy, J. Simons, S. J. McBeath, and I. Matejusova: Marine Scotland Marine Laboratory, Victoria Road, Torry, Aberdeen, UK AB11 9DB. I. R. Bricknell: School of Marine Science, Hitchner Hall, University of Maine, Orono, ME 04469, USA. Correspondence to K. Urquhart: tel: +44 1224 295609; fax: +44 1224 295511; e-mail: k.urquhart@marlab.ac.uk.

## Introduction

Sea trout (*Salmo trutta*) are anadromous fish that migrate to the sea and return to freshwater to spawn. They generally remain close to the coast during their marine phases and may return to freshwater to spawn more frequently than Atlantic salmon (*S. salar*; Laird and Needham, 1991; Gargan *et al.*, 2006).

Stocks of sea trout have declined substantially on the west coast of Scotland and Ireland over the past 20 years, likely as a consequence of an increase in marine mortality coupled with possible interaction with sea lice arising from aquaculture (Butler, 2002; Penston *et al.*, 2004). Similar declines have also been observed in areas free of marine finfish aquaculture, such as southwest of Scotland, England, and Wales (McGeorge and Sommerville, 1996). The decline in the numbers of sea trout is not due to a single cause, but is multifactorial in nature (Costelloe *et al.*, 1998). For example, both sea surface temperature and the abundance of pathogenic organisms may impact the marine phase of sea trout, because both have been linked to the decline in the condition of returning Atlantic salmon over the past decade (Todd *et al.*, 2008).

Previous surveys of sea trout have focused on the numbers of sea trout in different locations (Calderwood, 1930; Nall, 1930; Anon., 2003). Although some surveys have reported the presence of ectoparasites on wild sea trout (MacKenzie *et al.*, 1998; Schram *et al.*, 1998; Todd *et al.*, 2000; Urquhart *et al.*, 2008), no studies have described the overall health status of wild sea trout populations.

This study describes a survey to determine the presence of viral and bacterial agents and the numbers of metazoan parasites on wild sea trout around Scotland. Wild sea trout were sampled from five locations, two on the west coast and three on the east coast of Scotland, between 2005 and 2007. The trout were examined for the presence of fish pathogens, and differences in parasite abundance between parasite species, locations, and years were investigated.

## Material and methods

### Wild sea trout sampling sites

The sampling sites are shown in Figure 1. A total of 90 wild sea trout was obtained from bagnets near the North Esk (NGR NO 742 625) on the Scottish east coast in May and June of 2005, 2006, and 2007, as described in Urquhart *et al.* (2008). Another 58 wild sea trout were obtained by sweepnetting in the Upper Forth estuary near Alloa (NGR NS 831 945) on the Scottish east coast between May and August of 2006 and 2007. In all, 32 wild sea trout were caught by gillnetting from Stonehaven Bay (NGR NO 882 856) in July 2006. Fish could not be sampled from Stonehaven Bay in other years for conservation reasons. On the Scottish west coast, gillnetting was used to capture 60 wild sea trout from the River Annan (NGR NY 206 672) in July and August of 2006 and 2007, and 60 more from the River Carron (NGR NG 925 425) between August and December of 2006 and 2007. Fish were euthanized by concussion in the field, and samples were taken for virological and bacterial analysis, as

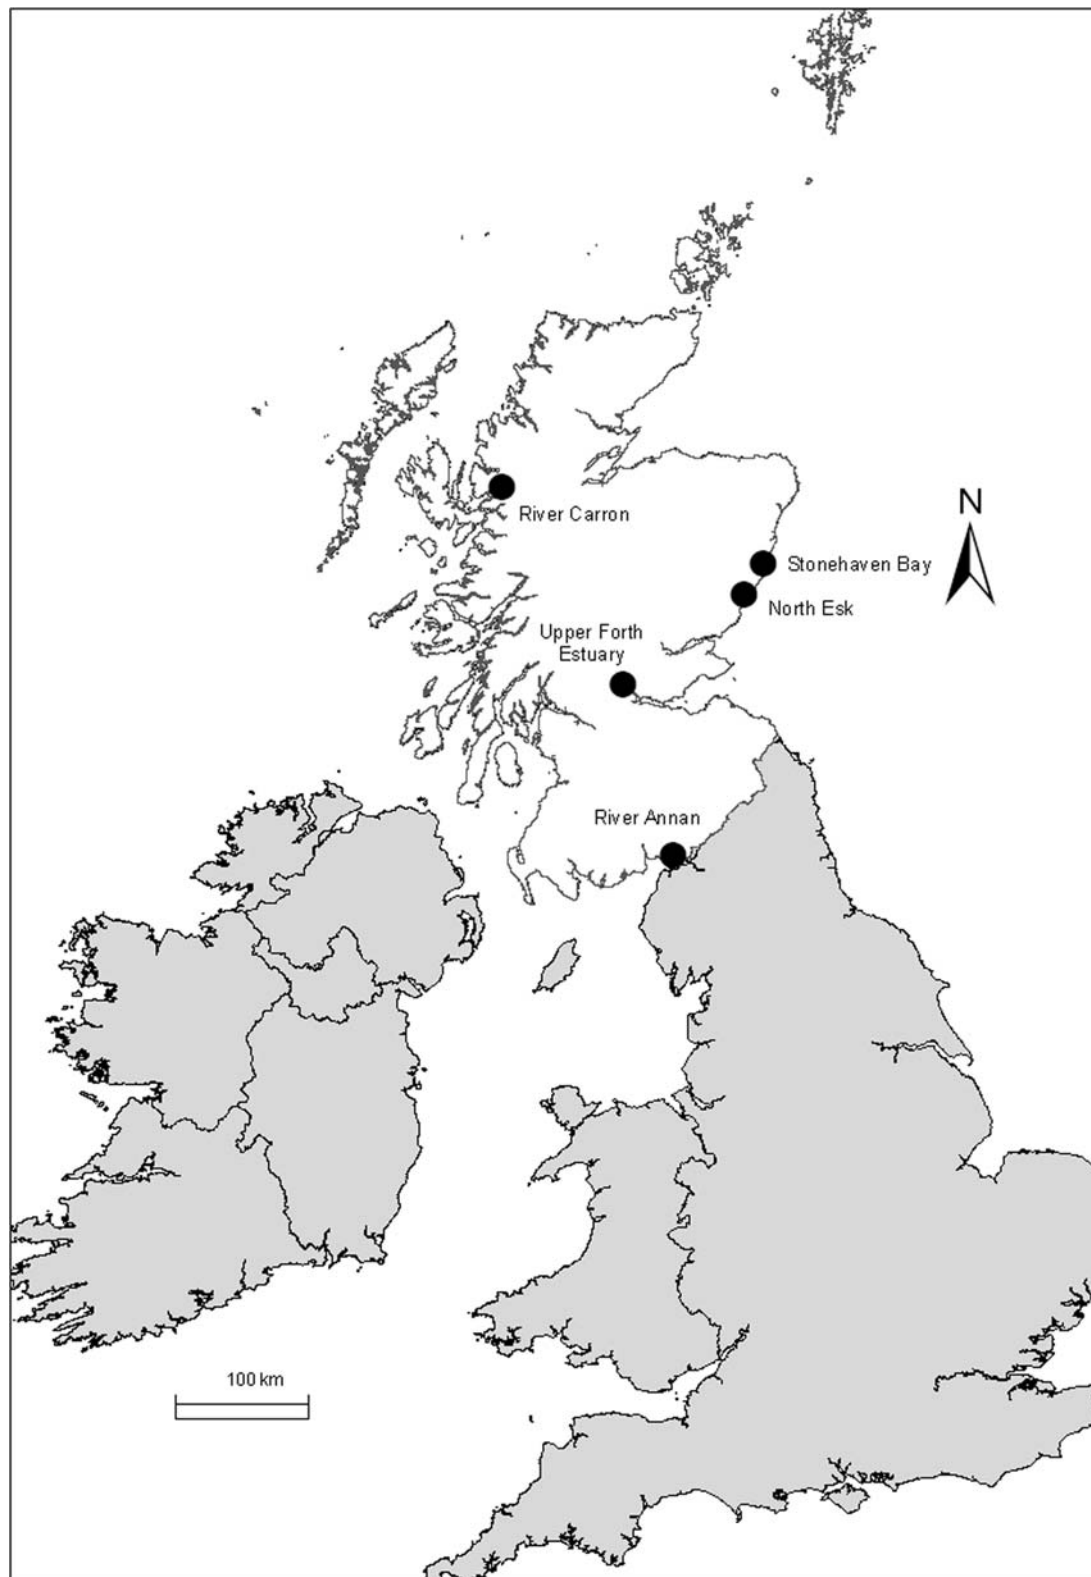

**Figure 1.** Map showing the sampling sites around Scotland.

described below. Fish were screened visually (by eye) for ectoparasites, and scales were removed from each fish for age determination (Table 1). Fish were then placed into individual labelled polythene bags and transported to the laboratory at 4°C. At the

laboratory, length and weight of each fish were recorded (Table 1), body surface, gills, and fins were examined for ectoparasites, and fish were frozen at  $-20^{\circ}\text{C}$  until further screening was carried out for the presence of endoparasites.

**Table 1.** Number of sea trout, median length, weight, and sea age (with ranges in parenthesis) for each site and year.

| Area                | Year | Number of fish | Length (cm)       | Weight (kg)       | Sea age  |
|---------------------|------|----------------|-------------------|-------------------|----------|
| North Esk           | 2005 | 30             | –                 | 1.11 (0.73, 2.13) | –        |
|                     | 2006 | 30             | 44.0 (38.0, 49.0) | 1.10 (0.67, 1.91) | 1 (1, 1) |
|                     | 2007 | 28             | 45.8 (37.8, 64.9) | 1.06 (0.66, 2.42) | 1 (1, 2) |
| Upper Forth estuary | 2006 | 32             | 46.6 (29.1, 62.3) | 1.09 (0.34, 2.06) | 1 (1, 2) |
|                     | 2007 | 30             | 45.7 (40.3, 56.5) | 1.21 (0.88, 2.08) | 1 (1, 1) |
| Stonehaven Bay      | 2006 | 30             | 48.0 (28.0, 66.0) | 1.16 (0.23, 2.87) | 1 (1, 2) |
| River Carron        | 2006 | 30             | 22.1 (19.7, 29.0) | 0.16 (0.08, 0.31) | 3 (2, 4) |
|                     | 2007 | 30             | 30.8 (18.2, 37.2) | 0.31 (0.05, 0.53) | 2 (1, 3) |
| River Annan         | 2006 | 30             | 23.8 (19.5, 37.6) | 0.16 (0.10, 0.75) | 2 (0, 3) |
|                     | 2007 | 30             | 25.7 (22.3, 28.6) | 0.18 (0.14, 0.28) | –        |

Length was not recorded at the North Esk in 2005. Age was not recorded at the North Esk in 2005 or the River Annan in 2007, and only 12 fish were aged at the River Carron in 2006.

### Screening of sea trout for viral and bacterial pathogens

All fish sampled were screened for the presence of viral disease agents, including infectious salmon anaemia virus, viral haemorrhagic septicaemia virus, infectious haematopoietic necrosis virus, salmonid alphavirus, and infectious pancreatic necrosis virus (IPNV), using the following cell lines: TO, bluegill (*Lepomis macrochirus*) fry (BF<sub>2</sub>), fathead minnow (*Pimephales promelas*) (FHM), and Chinook salmon (*Oncorhynchus tshawytscha*) embryo-214 (CHSE) for the last two pathogens, respectively. Samples of kidney, liver, spleen, brain, and heart were taken into transport medium [L-15 medium supplemented with 10% newborn calf serum (Biowhittaker; Life Technologies), 200 U ml<sup>-1</sup> penicillin–streptomycin (Life Technologies), 1 mg ml<sup>-1</sup> gentamycin (Life Technologies), 200 U ml<sup>-1</sup> polymyxin B sulphate (Sigma), and adjusted to a pH of 7.4] and processed by standard virology tissue-culture methods (Dannevig *et al.*, 1995; EU, 2001; Smail *et al.*, 2003).

Samples of anterior kidney were taken and inoculated onto each of Tryptone Soya Agar (Oxoid), Tryptone Soya Agar supplemented with 2% w/v sodium chloride (NaCl, Oxoid, Sigma), Mueller–Hinton agar supplemented with 2% w/v cysteine (Oxoid, Sigma), and Anacker and Ordal agar (Oxoid) using a sterile, disposable inoculating loop and screened for the presence of pathogenic bacteria by standard bacterial-culture methods (Holt *et al.*, 1994).

### Screening of sea trout for metazoan parasites

A visual assessment of the external surface of each fish was carried out in the field to determine ectoparasite loads, as described by Pert *et al.* (2009). Briefly, any visible ectoparasites observed at the time of sampling were recorded, and their position on the host was noted prior to transfer into 70% ethanol for further identification under a light microscope. Whole fish were then frozen in individual bags prior to further analysis.

Fish were defrosted, fins and gills removed with scissors, and fish were placed into separate Petri dishes, irrigated with water, and examined under a dissecting microscope (Wild Heerbrugg) at up to  $\times 400$  final magnification.

To determine endoparasite loads, the lower jaw, operculum, and eyes were removed and placed into separate Petri dishes before the upper surface of the mouth was examined visually. The visceral cavity was opened longitudinally along the ventral surface, followed by perpendicular anterior and posterior cuts through the peritoneum, and the liver, spleen, gonads, and gut were removed and placed on a metal tray. The gut was divided

into stomach, pyloric caeca, anterior intestine, mid-intestine, and rectum before being placed into separate Petri dishes and examined under a dissecting microscope (Wild Heerbrugg) at up to  $\times 400$  final magnification.

Each section of the alimentary tract was opened longitudinally with a scalpel and examined initially for parasites *in situ*. The contents were scraped into a Petri dish with a little water, then examined. Heart and kidney were removed and placed into individual Petri dishes, cut into sections, and examined. Any parasites found during the sampling process were preserved by placing them into a 7-ml bijou tube (Greiner) containing 70% ethanol (Sigma) before morphological examination and identification to species level using Moravec (2004) binomial keys.

### Data analysis

Differences in parasite abundance between species, areas, and years were investigated using hierarchical generalized linear models (Lee *et al.*, 2006). These allow the observed abundance values to be distributed with Poisson errors, the standard distribution for count data (McCullagh and Nelder, 1989), augmented by a variance component allowing for additional fish-to-fish variation (overdispersion). Hierarchical generalized linear models extend the more familiar generalized linear-mixed models (McCulloch and Searle, 2001); they can have random effects (such as the fish-to-fish variation) with distributions other than the normal distribution, tend to give less biased estimates, and have better inferential tools (Lee *et al.*, 2006).

Let  $z_{pf}$  be the count of parasite species  $p$  on fish  $f$ . It was assumed that  $z_{pf}$  has a Poisson distribution with mean  $\mu_p \varepsilon_{pf}$ , where  $\mu_p$  is the mean abundance of parasite species  $p$  and  $\varepsilon_{pf}$  is a gamma-distributed random effect with mean 1 and s.d.  $\sigma_p$ . Within-fish correlations among the random effects were negligible and ignored. The mean abundance values were related to the explanatory variables, parasite species, area, and year, through a log link. First, a full model, log mean abundance  $\sim$  parasite species  $\times$  area  $\times$  year, was fitted to the data. The three explanatory variables are all categorical, and the full model includes all their main effects and interactions. The model was then simplified in a backwards stepwise procedure on the basis of Akaike's Information Criterion (AIC) defined as:  $AIC = -2 \times \log\text{-likelihood} + 2 \times \text{number of parameters in the mean model}$ . The model with the fewest parameters within two units of the minimum AIC was considered the best of the competing models (Jones, 1993). All  $p$ -values presented in the text are based on likelihood-ratio tests, because these are more reliable than

comparing parameter estimates with their standard errors. Values of  $p$  for pairwise comparisons between sites were corrected for the number of comparisons. All statistical analyses were carried out using GenStat for Windows, 12th edition (Payne *et al.*, 2009).

## Results

In all, 300 wild sea trout were captured for study. On the east coast, 96% were first-sea-winter (1SW) fish. On the west coast, the fish ranged from finnock (sea trout returning to freshwater a few months after migrating as smolts) to fourth-sea-winter (4SW) fish, with a median sea age of 2 years. The fish from the east coast were typically larger than those from the west coast (Table 1).

All fish tested negative for bacterial pathogens. Only one fish from the River Carron tested positive for the viral pathogen IPNV during 2007. Two fish from Stonehaven Bay (2006) and two fish from the Upper Forth estuary (2007) tested positive for syncytia on the Chinook salmon embryo (CHSE-214) cell line. The causative agent of the syncytia was aquareovirus (Murray, 2009).

The prevalence and the abundance of all metazoan parasites observed in this study are summarized in Tables 2 and 3. Metazoan ectoparasites were found on 49% of the fish. These consisted of two species of Copepoda (*Lepeophtheirus salmonis* and *Caligus elongatus*) and one species of Isopoda (*Gnathia elongatus*), found only in the Upper Forth estuary in 2006. Totals of 9182 endoparasites and >2000 cysts were identified and classified as Cestoda, Digenea, Nematoda, and Acanthocephala (Table 4). For simplicity, the modelling of parasite abundance was restricted to

the years 2006 and 2007 to the four sites that were sampled in both years (North Esk, Upper Forth estuary, River Carron, and River Annan) and to six parasite species found in sufficient numbers for analysis (the ectoparasites *L. salmonis* and *C. elongatus*, and the endoparasites *Anisakis* sp., *Hysterothylacium aduncum*, *Eubothrium* sp., and *Pomphorhynchus laevis*).

Parasite abundance was adequately described by the model:  $\log \text{mean abundance} \sim \text{area} \times \text{parasite species} + \text{year} \times \text{parasite species}$ . Therefore, parasite abundance depended on area, although the relationship differed between species ( $p < 0.0001$ ); i.e. there was an interaction between area and species. Area had a significant effect on the abundance of all six species (*Eubothrium* sp.:  $p = 0.013$ ; all others:  $p < 0.0001$ ; Figure 2). The abundance of *H. aduncum*, *Anisakis* sp., and *L. salmonis* was greater at the east coast sites ( $p < 0.0001$  in all cases). The abundance of *C. elongatus* was greatest at North Esk ( $p < 0.0001$ ), and there were no differences between the other three sites ( $p > 0.05$ ). The abundance of *Eubothrium* sp. was greater in the Upper Forth estuary than in the River Annan ( $p = 0.042$ ), whereas all other area comparisons were non-significant; and the abundance of *P. laevis* was greatest in the River Carron ( $p < 0.0001$ ), with no differences between the other three sites ( $p > 0.05$ ). Parasite abundance also depended on year, with the relationship differing between species ( $p < 0.0001$ ). The abundance of *H. aduncum* was greater in 2007, whereas that of *P. laevis* was greater in 2006 ( $p < 0.0001$  in both cases; Figure 3). The abundance of the other species did not differ significantly between years ( $p > 0.05$ ). There was no interaction between area and year, so

**Table 2.** Observed prevalence (%) of ecto- and endoparasites for each sampling site and year.

| Taxon                               | North Esk |      |      | Upper Forth estuary |      | Stonehaven Bay | River Carron |      | River Annan |      |
|-------------------------------------|-----------|------|------|---------------------|------|----------------|--------------|------|-------------|------|
|                                     | 2005      | 2006 | 2007 | 2006                | 2007 |                | 2006         | 2007 | 2006        | 2007 |
| <i>Lepeophtheirus salmonis</i>      | 100       | 93   | 87   | 29                  | 60   | 84             | –            | 3    | 23          | 10   |
| <i>Caligus elongatus</i>            | 90        | 43   | 50   | –                   | 3    | 50             | –            | –    | –           | –    |
| <i>Discocotyle sagittata</i>        | 17        | –    | –    | –                   | –    | –              | –            | –    | –           | –    |
| <i>Gnathia elongatus</i>            | –         | –    | –    | 4                   | –    | –              | –            | –    | –           | –    |
| <i>Eubothrium</i> sp.               | 23        | 17   | 13   | 18                  | 20   | –              | 3            | 10   | 3           | 7    |
| <i>Diphyllbothrium</i> sp. (larvae) | 23        | –    | –    | –                   | 10   | –              | –            | –    | –           | –    |
| Cestode                             | 7         | –    | –    | 7                   | –    | 3              | –            | –    | 3           | –    |
| <i>Bucephalus polymorphus</i>       | –         | –    | –    | –                   | –    | –              | –            | –    | 3           | –    |
| <i>Cryptocotyle lingua</i>          | –         | –    | –    | –                   | –    | –              | 3            | –    | 3           | –    |
| <i>Hemiurus</i> sp.                 | 3         | –    | –    | –                   | –    | –              | –            | –    | –           | –    |
| <i>Hemiurus communis</i>            | –         | 3    | –    | –                   | –    | –              | –            | –    | –           | –    |
| <i>Podocotyle atamon</i>            | 23        | –    | –    | –                   | 10   | –              | –            | –    | –           | –    |
| <i>Diplostomum</i> sp.              | 10        | –    | –    | –                   | –    | –              | –            | –    | –           | –    |
| <i>Anisakis</i> sp.                 | 40        | 83   | 100  | 96                  | 100  | 69             | 3            | 7    | –           | –    |
| <i>Hysterothylacium aduncum</i>     | 60        | 70   | 77   | 61                  | 87   | 12             | –            | 10   | 3           | –    |
| <i>Hysterothylacium fabri</i>       | –         | –    | 3    | –                   | 10   | –              | –            | 3    | –           | –    |
| <i>Contracaecum</i> sp.             | –         | 13   | 10   | 14                  | 27   | 3              | 3            | –    | –           | –    |
| <i>Pseudoterranova</i>              | –         | –    | –    | 11                  | 3    | –              | –            | –    | –           | –    |
| <i>Pseudoterranova decipiens</i>    | –         | 13   | 3    | 4                   | 3    | 12             | –            | –    | –           | –    |
| <i>Cucullanus cirratus</i>          | –         | –    | –    | 4                   | –    | 3              | –            | –    | –           | –    |
| <i>Cucullanus truttae</i>           | 13        | –    | –    | –                   | 17   | –              | –            | –    | –           | –    |
| <i>Cystidicoides ephemeridarum</i>  | –         | –    | –    | –                   | –    | 3              | –            | –    | –           | –    |
| <i>Capillaria</i> sp.               | 17        | –    | –    | –                   | –    | –              | –            | –    | –           | –    |
| <i>Pomphorhynchus laevis</i>        | –         | –    | –    | –                   | –    | –              | 37           | 17   | 7           | –    |
| <i>Acanthocephalus anguillae</i>    | –         | 3    | –    | –                   | –    | –              | –            | –    | –           | –    |
| <i>Neoechinorhynchus</i>            | –         | –    | –    | –                   | 3    | –              | –            | –    | –           | –    |
| Cysts                               | –         | 3    | –    | –                   | –    | –              | –            | –    | –           | –    |

Blank cells indicate zero prevalence.

**Table 3.** Sample mean abundance of endo- and ectoparasites (with standard errors in parenthesis) for each sampling site and year.

| Taxon                                | North Esk   |              |               | Upper Forth estuary |               | Stonehaven Bay<br>2006 | River Carron |             | River Annan |             |
|--------------------------------------|-------------|--------------|---------------|---------------------|---------------|------------------------|--------------|-------------|-------------|-------------|
|                                      | 2005        | 2006         | 2007          | 2006                | 2007          |                        | 2006         | 2007        | 2006        | 2007        |
| <i>Lepeophtheirus salmonis</i>       | 7.87 (1.02) | 6.07 (0.72)  | 3.40 (0.46)   | 0.82 (0.32)         | 1.17 (0.25)   | 3.03 (0.41)            |              | 0.03 (0.03) | 0.37 (0.07) | 0.10 (0.06) |
| <i>Caligus elongatus</i>             | 8.56 (1.88) | 1.47 (0.28)  | 0.86 (0.19)   |                     | 0.03 (0.03)   | 1.06 (0.27)            |              |             |             |             |
| <i>Discocotyle sagittata</i>         | 0.20 (0.09) |              |               |                     |               |                        |              |             |             |             |
| <i>Gnathia elongatus</i>             |             |              |               | 0.04 (0.04)         |               |                        |              |             |             |             |
| <i>Eubothrium</i> sp.                | 0.37 (0.13) | 0.17 (0.07)  | 0.20 (0.10)   | 0.32 (0.16)         | 0.30 (0.13)   |                        | 0.03 (0.03)  | 0.10 (0.06) | 0.03 (0.03) | 0.07 (0.05) |
| <i>Diphyllbothrium</i> sp. (larvae)  | 0.43 (0.16) |              |               |                     | 0.23 (0.17)   |                        |              |             |             |             |
| Cestode                              | 0.10 (0.07) |              |               | 0.07 (0.05)         |               | 0.03 (0.03)            |              |             | 0.03 (0.03) |             |
| <i>Bucephalus polymorphus</i>        |             |              |               |                     |               |                        |              |             | 0.03 (0.03) |             |
| <i>Cryptocotyle lingua</i>           |             |              |               |                     |               |                        | 0.10 (0.10)  |             | 0.23 (0.23) |             |
| <i>Hemiurus</i> sp.                  | 0.07 (0.07) |              |               |                     |               |                        |              |             |             |             |
| <i>Hemiurus communis</i>             |             | 0.03 (0.03)  |               |                     |               |                        |              |             |             |             |
| <i>Podocotyle atamon</i>             | 0.77 (0.33) |              |               |                     | 0.23 (0.13)   |                        |              |             |             |             |
| <i>Diplostomum</i> sp.               | 0.40 (0.27) |              |               |                     |               |                        |              |             |             |             |
| <i>Anisakis</i> sp.                  | 1.17 (0.80) | 9.5 (1.87)   | 22.47 (5.69)  | 43.00 (10.55)       | 27.23 (5.64)  | 5.91 (1.23)            | 0.03 (0.03)  | 0.07 (0.05) |             |             |
| <i>Hysterothylacium aduncum</i>      | 1.50 (0.35) | 18.13 (6.92) | 48.43 (19.87) | 14.50 (4.70)        | 71.17 (32.06) | 5.09 (4.78)            |              | 0.10 (0.06) | 0.03 (0.03) |             |
| <i>Hysterothylacium fabri</i>        |             |              | 0.17 (0.17)   |                     | 0.86 (0.53)   |                        |              | 0.03 (0.03) |             |             |
| <i>Contracaecum</i> sp.              |             | 0.21 (0.11)  | 0.17 (0.11)   | 1.07 (0.68)         | 1.30 (0.60)   | 0.03 (0.03)            | 0.03 (0.03)  |             |             |             |
| <i>Pseudoterranova</i>               |             |              |               | 0.14 (0.08)         | 0.03 (0.03)   |                        |              |             |             |             |
| <i>Pseudoterranova decipiens</i>     |             | 0.93 (0.55)  | 0.23 (0.23)   | 0.07 (0.07)         | 0.10 (0.10)   | 0.28 (0.14)            |              |             |             |             |
| <i>Cucullanus cirratus</i>           |             |              |               | 0.04 (0.04)         |               | 0.09 (0.09)            |              |             |             |             |
| <i>Cucullanus truttae</i>            | 0.23 (0.12) |              |               |                     | 0.70 (0.57)   |                        |              |             |             |             |
| <i>Cystidicoloides ephemeridarum</i> |             |              |               |                     |               | 0.06 (0.06)            |              |             |             |             |
| <i>Capillaria</i> sp.                | 0.43 (0.18) |              |               |                     |               |                        |              |             |             |             |
| <i>Pomphorhynchus laevis</i>         |             |              |               |                     |               |                        | 5.53 (2.81)  | 0.33 (0.15) | 0.57 (0.50) |             |
| <i>Acanthocephalus anguillae</i>     |             | 0.11 (0.10)  |               |                     |               |                        |              |             |             |             |
| <i>Neoechinorhynchus</i>             |             |              |               |                     | 0.03 (0.03)   |                        |              |             |             |             |
| Cysts                                |             | > 66.7       |               |                     |               |                        |              |             |             |             |

Blank cells indicate zero prevalence.

**Table 4.** Classification of ecto- and endoparasites.

| Class          | Species                              | Life cycle | Intermediate hosts*                                                 | Definitive host                                                  | Site of infection                                                                                     |
|----------------|--------------------------------------|------------|---------------------------------------------------------------------|------------------------------------------------------------------|-------------------------------------------------------------------------------------------------------|
| Ectoparasites  |                                      |            |                                                                     |                                                                  |                                                                                                       |
| Copepoda       | <i>Lepeophtheirus salmonis</i>       | Direct     | None                                                                | Salmonids                                                        | Body surface, in mouth, and under operculum                                                           |
|                | <i>Caligus elongatus</i>             | Direct     | None                                                                | Marine fish                                                      | Skin and gills                                                                                        |
| Isopoda        | <i>Gnathia elongatus</i>             | Direct     | None                                                                | Marine fish                                                      | Fish external surface and gills                                                                       |
| Endoparasites  |                                      |            |                                                                     |                                                                  |                                                                                                       |
| Monogenea      | <i>Discocotyle sagittata</i>         | Direct     | None                                                                | Salmonids                                                        | Gills                                                                                                 |
| Cestoda        | <i>Eubothrium</i> sp.                | Indirect   | (1) Copepod                                                         | Salmonids and cyprinids                                          | Intestine, pyloric caeca                                                                              |
|                | <i>Diphylobothrium</i> spp.          | Indirect   | (2) Molluscs <sup>a</sup> and fish sp. <sup>b</sup>                 | Salmonids, Osmerids                                              | Encapsulated on stomach walls and intestine                                                           |
| Digenea        | <i>Bucephalus polymorphus</i>        | Indirect   | (2) Mussels <sup>a</sup> and fish sp. <sup>b</sup>                  | Many fish species                                                | Intestine                                                                                             |
|                | <i>Cryptocotyle lingua</i>           | Indirect   | (2) Mollusc <sup>a</sup> and fish; mainly Gobiidae <sup>b</sup>     | Fish-eating birds                                                | Musculature                                                                                           |
|                | <i>Hemiurus communis</i>             | Indirect   | (2) Copepodl <sup>a</sup> and planktonic invertebrates <sup>b</sup> | Many fish species                                                | Stomach                                                                                               |
|                | <i>Podocotyle atamon</i>             | Indirect   | (2) Mollusc <sup>a</sup> and crustaceans <sup>b</sup>               | Many fish species                                                | Intestine and pyloric caeca                                                                           |
|                | <i>Diplostomum</i> spp.              | Indirect   | (2) Mollusc <sup>a</sup> and fish sp. and amphibians <sup>b</sup>   | Aquatic birds                                                    | Lens of eye                                                                                           |
| Nematoda       | <i>Anisakis</i> sp.                  | Indirect   | (2) Crustaceans <sup>a</sup> and fish or squid <sup>b</sup>         | Seal/whale                                                       | Abdominal cavity and encysted in liver and some times musculature                                     |
|                | <i>Hysterothylacium aduncum</i>      | Indirect   | (1) Invertebrates and fish paratenic hosts                          | Migratory fish                                                   | Oesophagus, stomach, intestine, and pyloric caeca                                                     |
|                | <i>Hysterothylacium fabri</i>        | Direct     | None                                                                | Migratory fish                                                   | In salmonids intestine; other species encapsulated in intestine, pyloric caeca, and gallbladder walls |
|                | <i>Contracaecum</i>                  | Indirect   | (2) Copepods <sup>a</sup> and fish <sup>b</sup>                     | Seal                                                             | Mainly liver and pyloric caeca.                                                                       |
|                | <i>Pseudoterranova decipiens</i>     | Indirect   | (2) Crustacean <sup>a</sup> and fish <sup>b</sup>                   | Seal                                                             | Internal organs of abdominal cavity                                                                   |
|                | <i>Cucullanus cirratus</i>           | Direct     | None                                                                | Marine fish and freshwater salmonids                             | Intestine                                                                                             |
|                | <i>Cucullanus truttae</i>            | Indirect   | (1) Lamprey                                                         | Salmonids and lamprey                                            | Pyloric caeca and anterior intestine; abdominal cavity of lampreys                                    |
|                | <i>Cystidicoloides ephemeridarum</i> | Indirect   | (1) Mayflies                                                        | Salmonids                                                        | Stomach                                                                                               |
|                | <i>Capillaria</i> sp.                | Indirect   | Unknown                                                             | Freshwater and migratory fish; Salmoniformes and Scorpaeniformes | Intestine                                                                                             |
| Acanthocephala | <i>Pomphorhynchus laevis</i>         | Indirect   | (1) Gammarids (paratenic small fish)                                | Many fresh- and brackish-water fish species                      | Intestine                                                                                             |
|                | <i>Acanthocephalus anguillae</i>     | Indirect   | (1) Crustacean                                                      | Many fresh- and brackish-water fish species                      | Intestine                                                                                             |
|                | <i>Neoechinorhynchus</i> spp.        | Indirect   | (1) Crustacean                                                      | Mainly cyprinids                                                 | Intestine                                                                                             |

\*Numbers in parenthesis indicate the number of intermediate hosts the parasite is known to have.

<sup>a</sup>The first intermediate host.

<sup>b</sup>The second intermediate host.



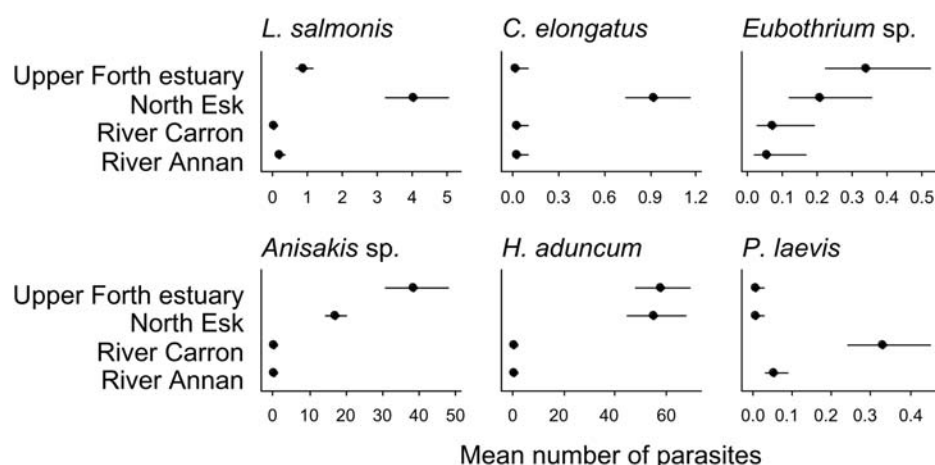

**Figure 2.** The effect of area on the abundance of each parasite species, with 95% confidence intervals. For easier interpretation, the area effects are centred on the estimated mean abundance at each site in 2007.

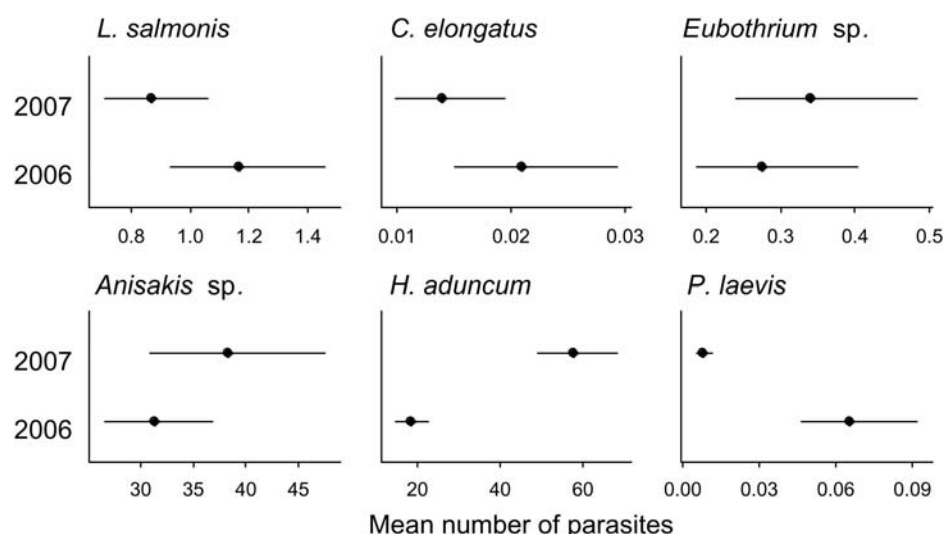

**Figure 3.** The effect of year on the abundance of each parasite species, with 95% confidence intervals. For easier interpretation, the year effects are centred on the estimated mean abundance in each year at the Upper Forth estuary.

the area effects were common to both years, and the year effects were common to all four areas.

Models investigating the effect of fish length were also considered. Fish length was partially confounded with area (Table 1), which made model fitting and interpretation more difficult. However, fish length had no significant effect on parasite abundance within areas ( $p > 0.05$ ), and it was never selected in preference to area by AIC.

## Discussion

The study investigated the presence of viral and bacterial agents and the abundance of metazoan parasites on wild sea trout in Scottish waters over a 3-year period. Most of the fish sampled appeared to be healthy, with no presence of lesions, haemorrhaging, or emaciation, with their organs showing no signs of pathogen infection, although some fish had high loads of both ecto- and endoparasites. No bacterial pathogens were isolated from the fish during this study. One viral pathogen and one viral agent were

isolated: one fish was IPNV-positive, and four fish tested positive for aquareovirus. We believe that this is the first report of aquareovirus from sea trout from the east coast of Scotland.

Sea trout from the east coast were typically larger, but younger, than those from the west coast (Table 1). This is consistent with the studies by the Atlantic Salmon Trust (1985), who reported that west coast fish tended to live longer, were slower-growing, and were smaller than east coast fish. There were some differences in sampling time and method between sites, but these are unlikely to have had a large effect on fish size. For example, gillnets, which were used on the west coast, were also used at Stonehaven Bay on the east coast, where fish were similar in size to the other east coast sites. Moreover, water temperatures (obtained retrospectively from marine fisheries agencies for each sampling occasion) in the River Carron were similar to those at the east coast sites, and only a few degrees lower than in the River Annan.

Significantly more *L. salmonis*, *H. aduncum*, and *Anisakis* sp. were found in fish at the east coast sites, and only *P. laevis* was

found in significantly greater numbers at a west coast site. There were small numbers, in some cases single individuals of the endoparasites *Diphyllbothrium* sp. (larvae), cestodes, *Hemiurus* sp., *Hemiurus communis*, *Podocotyle atamon*, *Diplostomum*, *Pseudoterranova* spp., *Capillaria* sp., *Cucullanus cirratus*, *Cucullanus truttae*, *Cystidicoloides ephemeridarum*, *Acanthocephalus anguillae*, *Neoechinorhynchus* sp., and cysts only found in fish from east coast sites. *Bucephalus polymorphus* and *Cryptocotyle lingua* were found in very small numbers only in fish captured at west coast sites. This may suggest that the area from which the fish were captured is an important factor for food source and parasite load and that the North Esk and Upper Forth estuary on the east coast are reservoirs of more enriched parasitic fauna than the River Carron and River Annan on the west. Limited information is available on the habitats at each of these sampling sites. It is also possible that the intermediate and final hosts of the parasites are absent from some sites, particularly on the west coast, which may have influenced the presence of parasites recorded in this study.

The migrations of sea trout cover both marine and freshwater environments, allowing for a wide parasite infection range (Gargan *et al.*, 2006). The monogenean parasite *Discocotyle sagittata* infects salmonids in freshwater and has a wide distribution in the northern hemisphere (Williams and Jones, 1994; Rubio-Godoy *et al.*, 2003). It has a narrow infection period of ~2 h between hatch and infection of the gills of its host, an event which is temperature-dependent (Gannicott and Tinsley, 1998). *Discocotyle sagittata* was the only monogenean parasite found among 129 parasites from ten locations in a survey of sea trout from the west coast of Ireland (Byrne *et al.*, 1999). In the present study, *D. sagittata* was found only on five fish in the North Esk in 2005, perhaps because of the small infection window or the fact that the parasite is found in freshwater and that all the fish were captured in estuarine and tidal areas. Most ectoparasites observed in this study were Copepoda. There were significantly more *L. salmonis* at the east coast sites than at the west coast sites in both 2006 and 2007. Although no differences were observed between fish length and parasite burden within a particular area, fish on the east coast fish were larger than those on the west, and this may have enabled them to harbour greater numbers of lice (Tucker *et al.*, 2002). Larger fish may also withstand higher infestation loads of ectoparasites (Tucker *et al.*, 2002), which would explain the good overall health of the east coast fish. The numbers of *L. salmonis* differed significantly between sites, with the differences persisting between years. As *L. salmonis* is a major parasite of salmonids, this observation could be significant for farm location.

It is well-documented that wild populations of salmonids carry sea lice (Bruno and Poppe, 1996; Stein *et al.*, 2005). It has also been suggested that the numbers of *L. salmonis* on wild fish are generally lower than on farmed fish (Bruno and Poppe, 1996; Dawson *et al.*, 1997; Butler, 2002). McVicar (1997) discussed the contribution of farmed fish to the infestation of wild salmonids by *L. salmonis*. However, the east coast sites were in areas devoid of fish farming, whereas the west coast sites were both near salmonid aquaculture. The numbers of lice recorded on the east coast in this study are similar to the numbers on sea trout captured in the sea off East Anglia, England, an area also free of salmonid mariculture (Tingley *et al.*, 1997). This would suggest that, because there are no fish farms near east coast sampling sites, they are not the source of the sea lice on the trout from the east coast.

Infestation by sea lice is related to population density (McVicar, 1997), so the greater lice numbers on the east coast may be attributable to the greater numbers of salmonids there. However, we have no evidence to support this hypothesis. No *C. elongatus* were found on fish from the River Carron or the River Annan, and only one *C. elongatus* was found on fish from the Upper Forth estuary (in 2007), which suggests that *C. elongatus* has a localized distribution. At all three east coast sites, the numbers of *C. elongatus* were much lower than the numbers of *L. salmonis*, possibly because salmonids are the ultimate host for *L. salmonis*, and *C. elongatus* has a broader host range (Kabata, 1979).

Two species of Cestoda were found in this study: *Eubothrium* sp. and *Diphyllbothrium* spp. In particular, *Eubothrium* sp. were observed at all sites, apart from Stonehaven Bay, over the 3-year study period. Cestodes can be found in both freshwater and seawater, but the marine environment is the most common region for infestation (Fahy, 1980; Scholz *et al.*, 2003). The overall abundance and prevalence of cestodes observed in this study were low compared with that documented by Fahy (1980), who recorded large numbers of *Eubothrium* sp. in fish that had only been at sea for a matter of weeks. The abundance of *Eubothrium* sp. decreases as trout become older owing to the stress put on these parasites by successive migrations (Fahy, 1980). Some of the fish captured in our study had been on successive migrations from freshwater to marine environments, which may have contributed to the low numbers recorded.

Several species of nematode were recorded in this study and constituted the majority of the endoparasites recorded. These included *Anisakis* spp., *H. aduncum*, *Hysterothylacium fabri*, *Contracaecum* sp., *Pseudoterranova* spp., *C. cirratus*, *C. truttae*, and *C. ephemeridarum*. The presence of these helminths is not uncommon in sea trout populations nor is the relatively high numbers, also reported by Byrne *et al.* (1999), who found a prevalence of 61.2% of *H. aduncum* from 129 sea trout sampled on the west coast of Ireland.

Three species of Acanthocephala were identified during this study, the most abundant being *P. laevis*, which was only found at the west coast sites. Three strains of *P. laevis* have been reported, two in freshwater and one in seawater (O'Mahony *et al.*, 2004). All strains are genetically different: the English strain arose from the cyprinid *Barbus barbus* (barbel), the Irish strain from freshwater salmonids, and a marine strain from the flounder (*Platichthys flesus*; Kennedy, 1984; Evans *et al.*, 2001; O'Mahony *et al.*, 2004). Salmonids became a substitute host for this parasite when cyprinid numbers declined in Ireland. Evans *et al.* (2001) found intensities of 5–14 worms per fish and a mean intensity of 9.5 worms in rainbow trout (*Oncorhynchus mykiss*) from Northern Ireland. In our study, the greatest abundance of *P. laevis* was 5.53 (s.e. 2.81) at the River Carron in 2006. The mean intensity of *P. laevis* was 7.5 worms, a similar level to that observed by Evans *et al.* (2001).

To conclude, a study of wild sea trout was carried out over a 3-year period at sites around Scotland to assess bacterial, viral, and metazoan parasite status. The sea trout had moderate burdens of both ecto- and endoparasites, but appeared to be in good health. One fish was confirmed as IPNV-positive and four fish were aquareovirus positive, but apart from these findings, no other viral or bacterial pathogen was isolated from the fish in the study. From this survey, there was no evidence of sea trout having higher metazoan-parasite burdens in areas where aquaculture is present than in those devoid of aquaculture activity. The fish captured on the east coast of Scotland were larger and had



higher burdens of both endo- and ectoparasites, which suggests that the area may have a more enriched range of parasitic fauna than the west coast of Scotland.

## Acknowledgements

We thank Bob Kindness, Bob Ritchie, Joe McGarvie, Nick Chisolm, and the netsmen at Marine Scotland Marine Laboratory for assisting in the collection of the fish used in this study. The Virology and Bacteriology Departments of Marine Scotland Marine Laboratory are thanked for their contributions in processing samples; in particular, and Warren Murray for his work on characterizing the Aquareovirus reported in this study. Mark Bilsby of the Dee District Salmon Board and Dave MacDonald of the Stonehaven Angling Board are thanked for their permission to fish, and Bryce Whyte for processing the scale samples and determining the age of the fish.

## References

- Anon. 2003. Statistical Bulletin. Scottish Salmon and Sea trout catches, 2003. Fisheries Research Services, Aberdeen.
- Atlantic Salmon Trust. 1985. Taxonomy and genetics. *In* The Biology of the Sea Trout. A Symposium held at Plas Menai, 24–26 October 1984, pp. 10. Ed. by E. D. Cren. Woods of Perth, Perth, Scotland.
- Bruno, D. W., and Poppe, T. T. 1996. A Colour Atlas of Salmonid Diseases. Academic Press, London.
- Butler, J. R. A. 2002. Wild salmonids and sea louse infestations on the west coast of Scotland: sources of infection and implications for the management of marine salmon farms. *Pest Management Science*, 58: 595–608.
- Byrne, C. J., Holland, C., and Tully, O. 1999. Metazoan parasite community structure of sea trout on the west coast of Ireland. *Journal of Fish Biology*, 55: 127–134.
- Calderwood, W. L. 1930. Salmon and the Sea Trout. Edward Arnold, London.
- Costelloe, M., Costelloe, J., O'Donohoe, G., Coghlan, N. J., Oonk, M., and Van Der Heijden, Y. 1998. Planktonic distribution of sea lice larvae, *Lepeophtheirus salmonis*, in Killary Harbour, west coast of Ireland. *Journal of the Marine Biological Association of the UK*, 78: 853–874.
- Dannevig, B. H., Falk, K., and Namork, E. 1995. Isolation of the causal virus of infectious salmon anaemia (ISA) in a long-term cell line from Atlantic salmon head kidney. *Journal of General Virology*, 76: 1353–1359.
- Dawson, L. H. J., Pike, A. W., Houlihan, D. F., and McVicar, A. H. 1997. Comparison of the susceptibility of sea trout (*Salmo trutta* L.) and Atlantic salmon (*Salmo salar* L.) to sea lice (*Lepeophtheirus salmonis* (Krøyer, 1837)) infections. *ICES Journal of Marine Science*, 54: 1129–1139.
- EU. 2001. Laying down the sampling plans and diagnostic methods for the detection and confirmation of certain fish diseases. Decision 2001/183, Official Journal of the European Union: L65–L76.
- Evans, D. W., Matthews, M. A., and McClintock, C. A. 2001. First record of *Pomphorhynchus laevis* (Acanthocephala) in fishes from Northern Ireland. *Journal of Fish Biology*, 59: 166–168.
- Fahy, E. 1980. *Eubothrium crassum* in migratory trout, *Salmo trutta* L., in the sea. *Journal of Fish Biology*, 16: 99–104.
- Gannicott, A. M., and Tinsley, R. C. 1998. Larval survival characteristics and behaviour of the gill monogenean *Discocotyle sagittata*. *Parasitology*, 117: 491–498.
- Gargan, P. G., Poole, W. R., and Forde, G. P. 2006. A review of the status of Irish sea trout stocks. *In* Sea Trout: Biology, Conservation and Management, pp. 349–355. Ed. by G. Harris, and N. Milner. Blackwell Publishing, Oxford.
- Holt, J. G., Krieg, N. R., Sneath, P. H. A., Staley, J. T., and Williams, S. T. 1994. Facultatively anaerobic gram-negative rods. *In* Bergey's Manual of Determinative Bacteriology, pp. 175–290. Ed. by W. R. Hensyl. Williams and Wilkins, Baltimore.
- Jones, R. H. 1993. Longitudinal Data with Serial Correlation: a State-Space Approach. Chapman and Hall, London. 240 pp.
- Kabata, Z. 1979. Parasitic Copepoda of British Fishes. The Ray Society, London.
- Kennedy, C. R. 1984. The status of flounders, *Platichthys flesus* L., as hosts of the Acanthocephalan *Pomphorhynchus laevis* (Muller) and its survival in marine conditions. *Journal of Fish Biology*, 24: 135–149.
- Laird, L., and Needham, T. 1991. The farmed salmonids. *In* Salmon and Trout Farming, pp. 21–22. Ed. by L. Laird, and T. Needham. Ellis Horwood Limited, Chichester, West Sussex, UK.
- Lee, Y., Nelder, J. A., and Pawitan, Y. 2006. Generalized Linear Models with Random Effects: Unified Analysis via H-likelihood. Chapman and Hall/CRC, Boca Raton, FL, USA.
- MacKenzie, K., Longshaw, M., Begg, G. S., and McVicar, A. H. 1998. Sea lice (Copepoda: Caligidae) on wild sea trout (*Salmo trutta* L.) in Scotland. *ICES Journal of Marine Science*, 55: 151–162.
- McCulloch, C. E., and Searle, S. R. 2001. Generalized, Linear, and Mixed Models. John Wiley, New York.
- McCullagh, P., and Nelder, J. A. 1989. Generalized Linear Models, 2nd edn. Chapman and Hall, London.
- McGeorge, J., and Somerville, C. 1996. The potential for interaction between the parasites of wild salmonids, non-salmonids and farmed Atlantic salmon in Scottish sea lochs. *In* Aquaculture and Sea Lochs, pp. 59–71. Ed. by K. D. Black. Harlequin Press, Oban, Scotland.
- McVicar, A. H. 1997. Disease and parasitic implications of the coexistence of wild and cultured Atlantic salmon populations. *ICES Journal of Marine Science*, 54: 1093–1103.
- Moravec, F. 2004. Metazoan Parasites of Salmonid Fishes of Europe. Academia, Praha.
- Murray, W. 2009. Characterisation and classification of an unknown virus isolated from wild caught sea trout (*Salmo trutta*). BSc Hons dissertation, The Robert Gordon University, Aberdeen, UK.
- Nall, G. H. 1930. The Life of the Sea Trout. Seeley, Service and Co., London.
- O'Mahony, E. M., Bradley, D. G., Kennedy, C. R., and Holland, C. V. 2004. Evidence for the hypothesis of strain formation in *Pomphorhynchus laevis* (Acanthocephala): an investigation using mitochondrial DNA sequences. *Parasitology*, 129: 341–347.
- Payne, R. W., Murray, D. A., Harding, S. A., Baird, D. B., and Soutar, D. M. 2009. GenStat for Windows, 12th edn. Introduction. VSN International, Hemel Hempstead, UK.
- Penston, M. J., McKibben, M. A., Hay, D. W., and Gillibrand, P. A. 2004. Observations on open-water densities of sea lice larvae in Loch Shieldaig, western Scotland. *Aquaculture Research*, 35: 793–805.
- Pert, C. C., Raffel, J., Urquhart, K., Weir, S. J., Kantola, K. M. H., and Bricknell, I. R. 2009. The pathogen burden of early returning sea trout (*Salmo trutta* L.) infected with *Lepeophtheirus salmonis*, in the river Shieldaig, Scotland. *Bulletin of the European Association of Fish Pathologists*, 29(6): 210–216.
- Rubio-Godoy, M., Sigh, J., Buchmann, K., and Tinsley, R. C. 2003. Antibodies against *Discocotyle sagittata* (Monogenea) in farmed trout. *Diseases of Aquatic Organisms*, 56: 181–184.
- Scholz, T., Kuchta, R., Shinn, A. P., Šnabel, V., and Hanzelová, V. 2003. Host specificity and geographical distribution of *Eubothrium* in European salmonid fish. *Journal of Helminthology*, 77: 255–262.
- Schram, T. A., Knutsen, J. A., Heuch, P. A., and Mo, T. A. 1998. Seasonal occurrence of *Lepeophtheirus salmonis* and *Caligus elongatus* (Copepoda: Caligidae) on sea trout (*Salmo trutta*), off southern Norway. *ICES Journal of Marine Science*, 55: 163–175.
- Smail, D. A., Burnside, K., Watt, A., and Munro, E. S. 2003. Enhanced cell culture isolation of infectious pancreatic necrosis virus from kidney tissue of carrier Atlantic salmon (*Salmo salar* L.) using

- sonication of the cell harvest. Bulletin of the European Association of Fish Pathologists, 23: 250–254.
- Stein, A., Bjørn, P. A., Heuch, P. A., and Elston, D. A. 2005. Population dynamics of salmon lice *Lepeophtheirus salmonis* on Atlantic salmon and sea trout. Marine Ecology Progress Series, 290: 263–275.
- Tingley, G. A., Ives, M. J., and Russell, I. C. 1997. The occurrence of lice on sea trout (*Salmo trutta* L.) captured in the sea off the East Anglian coast of England. ICES Journal of Marine Science, 54: 1120–1128.
- Todd, C. D., Hughes, S. L., Marshall, T., Maclean, J. C., Lonergan, M. E., and Martin Biuw, E. 2008. Detrimental effects of recent ocean surface warming on growth condition of Atlantic salmon. Global Change Biology, 14: 1–13.
- Todd, C. D., Walker, A. M., Hoyle, J. E., Northcott, S. J., Walker, A. F., and Ritchie, M. G. 2000. Infestations of wild adult Atlantic salmon (*Salmo salar* L.) by the ectoparasitic copepod sea louse *Lepeophtheirus salmonis* Krøyer: prevalence, intensity and the spatial distribution of males and females on the host fish. Hydrobiologia, 429: 181–196.
- Tucker, C. S., Sommerville, C., and Wootten, R. 2002. Does size really matter? Effects of fish surface area on settlement and initial survival of *Lepeophtheirus salmonis*, an ectoparasite of Atlantic salmon *Salmo salar*. Diseases of Aquatic Organisms, 49: 145–152.
- Urquhart, K., Pert, C. C., Kilburn, R., Fryer, R. J., and Bricknell, I. R. 2008. Prevalence, abundance and distribution of *Lepeophtheirus salmonis* and *Caligus elongatus* on wild sea trout *Salmo trutta* L. ICES Journal of Marine Science, 65: 171–173.
- Williams, H., and Jones, A. 1994. Parasitic Worms of Fish. Taylor and Francis, London.

doi:10.1093/icesjms/fsp271
